# Supplementary material
Source: PubMed Central journal article supplement (PMC8189641)
Supplement: NIHMS1708938-supplement-1.pdf [file NIHMS1708938-supplement-1.pdf]

**APPENDIX (online only).**

Arteries treated in the cohort: 1 = aorta, 2 = common iliac, 3 = external iliac, 4 = superficial femoral, 5 = popliteal, 6 = anterior tibial, 7 = tibioperoneal trunk, 8 = posterior tibial, 9 = peroneal, 10 = common femoral, 11 = profunda. The number of arteries treated equals any

combination of these discrete arterial territories (eg, common iliac [no. 2] and superficial femoral [no. 4] equaled two arteries treated; popliteal [no. 6], anterior tibial [no. 7], and peroneal [no. 9] equaled three arteries treated).

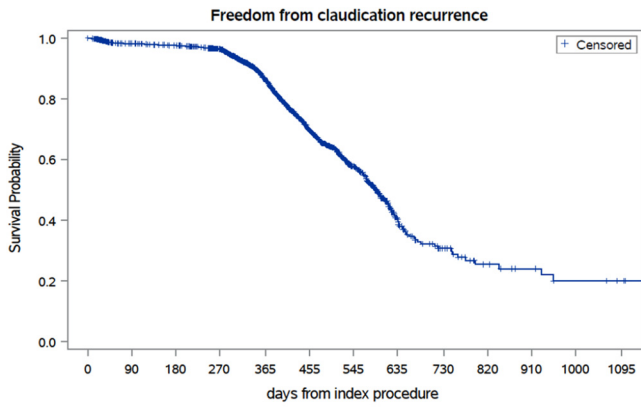

**Supplementary Fig 1 (online only).** Kaplan-Meier estimates for freedom from intermittent claudication (IC) recurrence over time. Standard error did not exceed 10%.

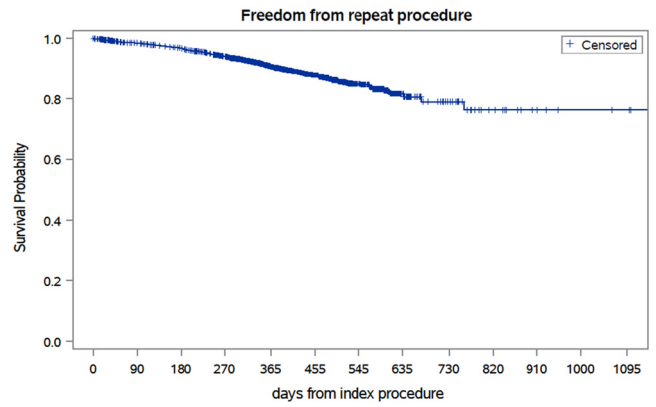

**Supplementary Fig 2 (online only).** Kaplan-Meier estimates for freedom from repeat procedures over time. Standard error did not exceed 10%.

**Supplementary Table I (online only).** Type of endovascular treatment used

| Endovascular treatment used         | Patients, No. (%) |
|-------------------------------------|-------------------|
| Angioplasty only                    | 2673 (16.7)       |
| Stent only                          | 2874 (17.9)       |
| Atherectomy only                    | 78 (0.49)         |
| Angioplasty and stent               | 8468 (52.8)       |
| Angioplasty and atherectomy         | 1199 (7.5)        |
| Stent and atherectomy               | 347 (2.2)         |
| Angioplasty, stent, and atherectomy | 397 (2.5)         |

**Supplementary Table II (online only).** Demographics and preoperative comorbidities for claudication patients undergoing endovascular procedures<sup>a</sup>

| Variable                              | Mean ± SD or No. (%) |
|---------------------------------------|----------------------|
| Age, years                            | 66 (10.4)            |
| Gender                                |                      |
| Male                                  | 2810 (61)            |
| Female                                | 1797 (39)            |
| Race                                  |                      |
| White                                 | 4054 (88)            |
| Black/other                           | 553 (12)             |
| Coronary artery disease               | 1152 (25)            |
| Current smoking                       | 2303 (50)            |
| Diabetes                              | 1705 (37)            |
| Discharge without antiplatelet/statin | 1244 (27)            |
| Hypertension                          | 3916 (85)            |
| More than two arteries treated        | 645 (14)             |
| Atherectomy used                      | 438 (9.5)            |

SD, Standard deviation.

<sup>a</sup>Sensitivity analysis (long-term follow-up group).

**Supplementary Table III (online only).** Adjusted analysis for claudication recurrence<sup>a</sup>

| Finding                        | OR or HR | 95% CI    | P value |
|--------------------------------|----------|-----------|---------|
| Logistic model results         |          |           |         |
| OR                             |          |           |         |
| Smoking                        | 1.05     | 0.89-1.25 | .53     |
| More than two arteries treated | 1.21     | 0.98-1.51 | .07     |
| Atherectomy                    | 1.00     | 0.77-1.29 | .99     |
| Antiplatelet/statin combined   | 0.81     | 0.68-0.97 | .02     |
| Survival model results         |          |           |         |
| HR                             |          |           |         |
| Smoking                        | 1.05     | 0.91-1.22 | .46     |
| More than two arteries treated | 1.32     | 1.10-1.59 | .02     |
| Atherectomy                    | 1.18     | 0.94-1.48 | .13     |
| Antiplatelet/statin combined   | 0.84     | 0.72-0.97 | .02     |

CI, Confidence interval; HR, hazard ratio; OR, odds ratio.

<sup>a</sup>Sensitivity analysis (long-term follow-up group).

**Supplementary Table IV (online only).** Adjusted analysis for repeat procedures<sup>a</sup>

| Finding                        | OR or HR | 95% CI    | P value |
|--------------------------------|----------|-----------|---------|
| Logistic model results         |          |           |         |
| OR                             |          |           |         |
| Smoking                        | 0.88     | 0.70-1.10 | .27     |
| More than two arteries treated | 1.54     | 1.18-2.00 | .001    |
| Atherectomy                    | 1.24     | 0.90-1.71 | .18     |
| Antiplatelet/statin combined   | 0.95     | 0.75-1.20 | .69     |
| Survival model results         |          |           |         |
| HR                             |          |           |         |
| Smoking                        | 0.88     | 0.71-1.09 | .24     |
| More than two arteries treated | 1.61     | 1.26-2.06 | .0001   |
| Atherectomy                    | 1.31     | 0.97-1.78 | .07     |
| Antiplatelet/statin combined   | 0.93     | 0.74-1.16 | .52     |

CI, Confidence interval; HR, hazard ratio; OR, odds ratio.

<sup>a</sup>Sensitivity analysis (long-term follow-up group).
